# Supplementary material for: Gender-based differences in host behavior and gut microbiota composition in response to high fat diet and stress in a mouse model
Source: PubMed Central journal article supplement (PMC5589737; doi:10.1038/s41598-017-11069-4), 2017-09-07
Supplement: 41598_2017_11069_MOESM1_ESM.pdf [file 41598_2017_11069_MOESM1_ESM.pdf]

**Gender-based differences in host behavior and gut microbiota composition in response to high fat diet and stress in a mouse model**

Laura C. Bridgewater<sup>ab\*</sup>, Chenhong Zhang<sup>b\*</sup>, Yanqiu Wu<sup>b</sup>, Weiwei Hu<sup>c</sup>, Qianpeng Zhang<sup>b</sup>, Jing Wang<sup>b</sup>, Shengtian Li<sup>c</sup>, Liping Zhao<sup>b§</sup>

*<sup>a</sup> Department of Microbiology and Molecular Biology, Brigham Young University, Provo, Utah, USA*

*<sup>b</sup> State Key Laboratory of Microbial Metabolism, School of Life Sciences and Biotechnology, Shanghai Jiao Tong University, Shanghai, P. R. China*

*<sup>c</sup> Bio-X Institutes, Shanghai Jiao Tong University, Shanghai, P. R. China*

\*These authors contributed equally to this work

§ Corresponding author:

Dr. Liping Zhao

Email: lpzhao@sjtu.edu.cn

## Supplementary Information

Table 1 The high-quality reads of samples.

| Day 0  |                    |     |                    |      |                    |     |                    |
|--------|--------------------|-----|--------------------|------|--------------------|-----|--------------------|
| Female |                    |     |                    | Male |                    |     |                    |
| NCD    | high-quality reads | HFD | high-quality reads | NCD  | high-quality reads | HFD | high-quality reads |
| A01    | 9100               | B01 | 7624               | C01  | 8657               | D01 | 9676               |
| A02    | 4775               | B02 | 6357               | C02  | 5343               | D02 | 818                |
| A03    | 7535               | B03 | 7343               | C03  | 5112               | D03 | 8065               |
| A04    | 4933               | B04 | 5647               | C04  | 7023               | D04 | 7040               |
| A05    | 4080               | B05 | 5992               | C05  | 7104               | D05 | 6454               |
| A06    | 7286               | B06 | 6133               | C06  | 4819               | D06 | 5768               |
| A07    | 3898               | B07 | 5407               | C07  | 9038               | D07 | 10027              |
| A08    | 4877               | B08 | 5786               | C08  | 7249               | D08 | 9179               |
| A09    | 4424               | B09 | 6207               | C09  | 5808               | D09 | 8677               |
| A10    | 6485               | B10 | 7201               | C10  | 6221               | D10 | 6500               |
| A11    | 8291               | B11 | 5519               | C11  | 5298               | D11 | 6011               |
| A12    | 5362               | B12 | 8081               | C12  | 8337               | D12 | 4330               |
| A13    | 6311               | B13 | 7795               | C13  | 7581               | D13 | 9728               |
| A14    | 3327               | B14 | 7132               | C14  | 7718               | D14 | 6013               |
| A15    | 6774               | B15 | 5695               | C15  | 5869               | D15 | 5972               |
| A16    | 5250               | B16 | 4154               | C16  | 7070               | D16 | 6198               |
| A17    | 8711               | B17 | 6830               |      |                    | D17 | 6951               |

  

| Day 81 |                    |     |                    |      |                    |     |                    |
|--------|--------------------|-----|--------------------|------|--------------------|-----|--------------------|
| Female |                    |     |                    | Male |                    |     |                    |
| NCD    | high-quality reads | HFD | high-quality reads | NCD  | high-quality reads | HFD | high-quality reads |
| A01    | 6538               | B01 | 7109               | C01  | 9068               | D01 | 10897              |
| A02    | 4497               | B02 | 5644               | C02  | 6857               | D02 | 10203              |
| A03    | 8097               | B03 | 4374               | C03  | 6506               | D03 | 9054               |
| A04    | 8289               | B04 | 8358               | C04  | 6751               | D04 | 9437               |
| A05    | 7452               | B05 | 6362               | C05  | 10449              | D05 | 10160              |
| A06    | 8315               | B06 | 6972               | C06  | 6603               | D06 | 9215               |
| A07    | 4629               | B07 | 7310               | C07  | 9236               | D07 | 13464              |
| A08    | 9872               | B08 | 7876               | C08  | 7658               | D08 | 6838               |
| A09    | 9005               | B10 | 7291               | C09  | 9916               | D09 | 6642               |
| A10    | 6615               | B11 | 5573               | C10  | 10374              | D10 | 9865               |
| A12    | 6477               | B12 | 6914               | C11  | 8961               | D11 | 9061               |
| A13    | 5674               | B13 | 9143               | C12  | 7163               | D12 | 9619               |
| A14    | 8171               | B14 | 8519               | C13  | 4892               | D13 | 8618               |
| A15    | 5543               | B16 | 11691              | C14  | 7282               | D14 | 11200              |
| A16    | 7416               | B17 | 10226              | C15  | 6157               | D15 | 6887               |
| A17    | 9431               |     |                    | C16  | 7996               | D16 | 11332              |
|        |                    |     |                    |      |                    | D17 | 9387               |

  

| Day 136 |                    |     |                    |      |                    |     |                    |
|---------|--------------------|-----|--------------------|------|--------------------|-----|--------------------|
| Female  |                    |     |                    | Male |                    |     |                    |
| NCD     | high-quality reads | HFD | high-quality reads | NCD  | high-quality reads | HFD | high-quality reads |
| A03     | 9751               | B01 | 5010               | C02  | 6913               | D01 | 7639               |
| A04     | 7148               | B02 | 11257              | C03  | 5672               | D02 | 5565               |
| A05     | 9425               | B03 | 8697               | C04  | 5291               | D03 | 4482               |
| A06     | 6988               | B05 | 5624               | C05  | 8212               | D04 | 6343               |
| A07     | 7589               | B07 | 8435               | C06  | 7863               | D05 | 8338               |
| A08     | 8000               | B09 | 7187               | C07  | 8296               | D06 | 11069              |
| A09     | 9283               | B10 | 6151               | C08  | 5791               | D07 | 6009               |
| A10     | 11876              | B11 | 7849               | C09  | 6829               | D08 | 5665               |
| A11     | 10904              | B12 | 4856               | C10  | 7164               | D10 | 8289               |
| A12     | 7534               | B13 | 5838               | C11  | 8770               | D11 | 7860               |
| A13     | 8316               | B14 | 9288               | C12  | 8713               | D13 | 9042               |
| A14     | 8702               | B15 | 8256               | C13  | 8813               | D14 | 4466               |
| A15     | 8538               | B16 | 8576               | C14  | 7567               | D15 | 7548               |
| A16     | 6757               | B17 | 5123               | C15  | 2421               | D16 | 8081               |
| A17     | 9014               |     |                    | C16  | 7037               | D17 | 5917               |

## Supplementary Figure 1

### Normal chow diet (NCD)

#### Formula

| Product #D12450B | gm%  | kcal% |
|------------------|------|-------|
| Protein          | 19.2 | 20    |
| Carbohydrate     | 67.3 | 70    |
| Fat              | 4.3  | 10    |
| <b>Total</b>     |      | 100   |
| <b>kcal/gm</b>   | 3.85 |       |

  

| Ingredient               | gm             | kcal        |
|--------------------------|----------------|-------------|
| Casein, 30 Mesh          | 200            | 800         |
| L-Cystine                | 3              | 12          |
| Corn Starch              | 315            | 1260        |
| Maltodextrin 10          | 35             | 140         |
| Sucrose                  | 350            | 1400        |
| Cellulose, BW200         | 50             | 0           |
| Soybean Oil              | 25             | 225         |
| Lard*                    | 20             | 180         |
| Mineral Mix S10026       | 10             | 0           |
| DiCalcium Phosphate      | 13             | 0           |
| Calcium Carbonate        | 5.5            | 0           |
| Potassium Citrate, 1 H2O | 16.5           | 0           |
| Vitamin Mix V10001       | 10             | 40          |
| Choline Bitartrate       | 2              | 0           |
| FD&C Yellow Dye #5       | 0.05           | 0           |
| <b>Total</b>             | <b>1055.05</b> | <b>4057</b> |

Formulated by E. A. Ulman, Ph.D., Research Diets, Inc., 8/26/98 and 3/11/99.

\*Typical analysis of cholesterol in lard = 0.72 mg/gram.  
Cholesterol (mg)/4057 kcal = 14.4  
Cholesterol (mg)/kg = 13.6

### High fat diet (HFD)

#### Formula

| Product #D12492 | gm%  | kcal% |
|-----------------|------|-------|
| Protein         | 26.2 | 20    |
| Carbohydrate    | 26.3 | 20    |
| Fat             | 34.9 | 60    |
| <b>Total</b>    |      | 100   |
| <b>kcal/gm</b>  | 5.24 |       |

  

| Ingredient               | gm            | kcal        |
|--------------------------|---------------|-------------|
| Casein, 30 Mesh          | 200           | 800         |
| L-Cystine                | 3             | 12          |
| Corn Starch              | 0             | 0           |
| Maltodextrin 10          | 125           | 500         |
| Sucrose                  | 68.8          | 275.2       |
| Cellulose, BW200         | 50            | 0           |
| Soybean Oil              | 25            | 225         |
| Lard*                    | 245           | 2205        |
| Mineral Mix S10026       | 10            | 0           |
| DiCalcium Phosphate      | 13            | 0           |
| Calcium Carbonate        | 5.5           | 0           |
| Potassium Citrate, 1 H2O | 16.5          | 0           |
| Vitamin Mix V10001       | 10            | 40          |
| Choline Bitartrate       | 2             | 0           |
| FD&C Blue Dye #1         | 0.05          | 0           |
| <b>Total</b>             | <b>773.85</b> | <b>4057</b> |

Formulated by E. A. Ulman, Ph.D., Research Diets, Inc., 8/26/98 and 3/11/99.

\*Typical analysis of cholesterol in lard = 0.72 mg/gram.  
Cholesterol (mg)/4057 kcal = 216.4  
Cholesterol (mg)/kg = 279.6

**Supplementary Figure 1** | Formulas of the normal chow diet (NCD) and high fat diet (HFD) used in this study, reproduced from product data sheets provided by Research Diets Inc.

## Supplementary Figure 2

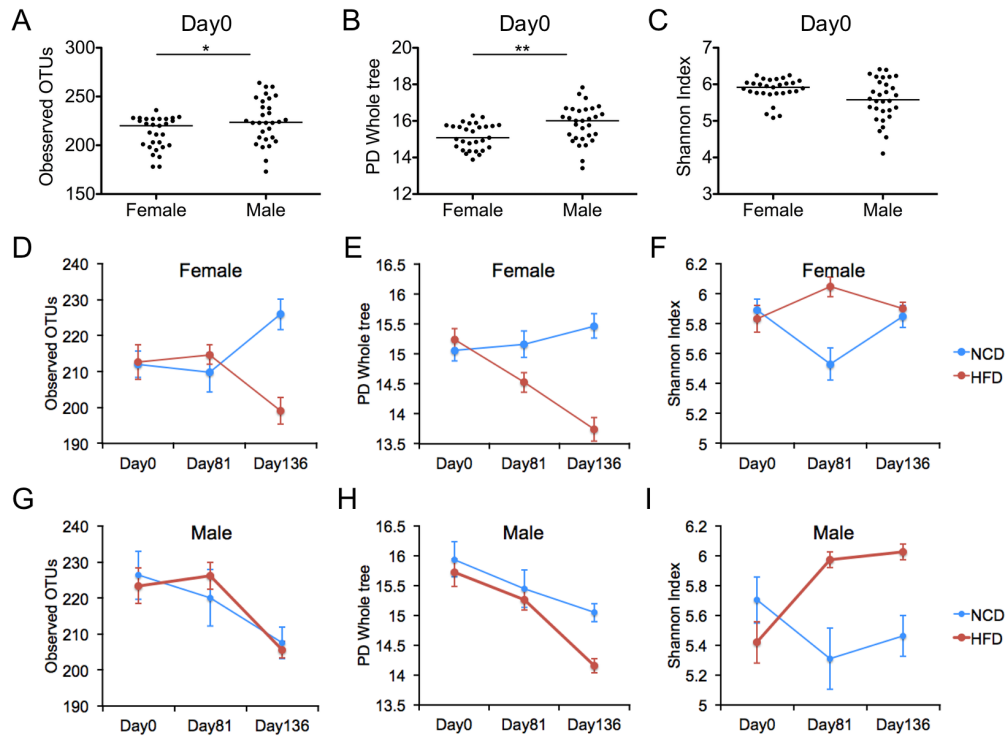

**Supplementary Figure 2** | The alpha-diversity of samples were calculated with observed OTUs, Faith's phylogenetic diversity (PD Whole tree) and the Shannon index.

## Supplementary Figure 3

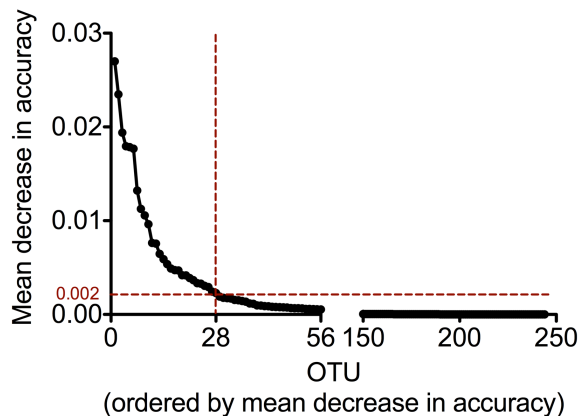

**Supplementary Figure 3** | key OTUs were identified by applying Random Forest classification for different sex on Day0, ranked in descending order of their feature accuracy of the models.

## Supplementary Figure 4

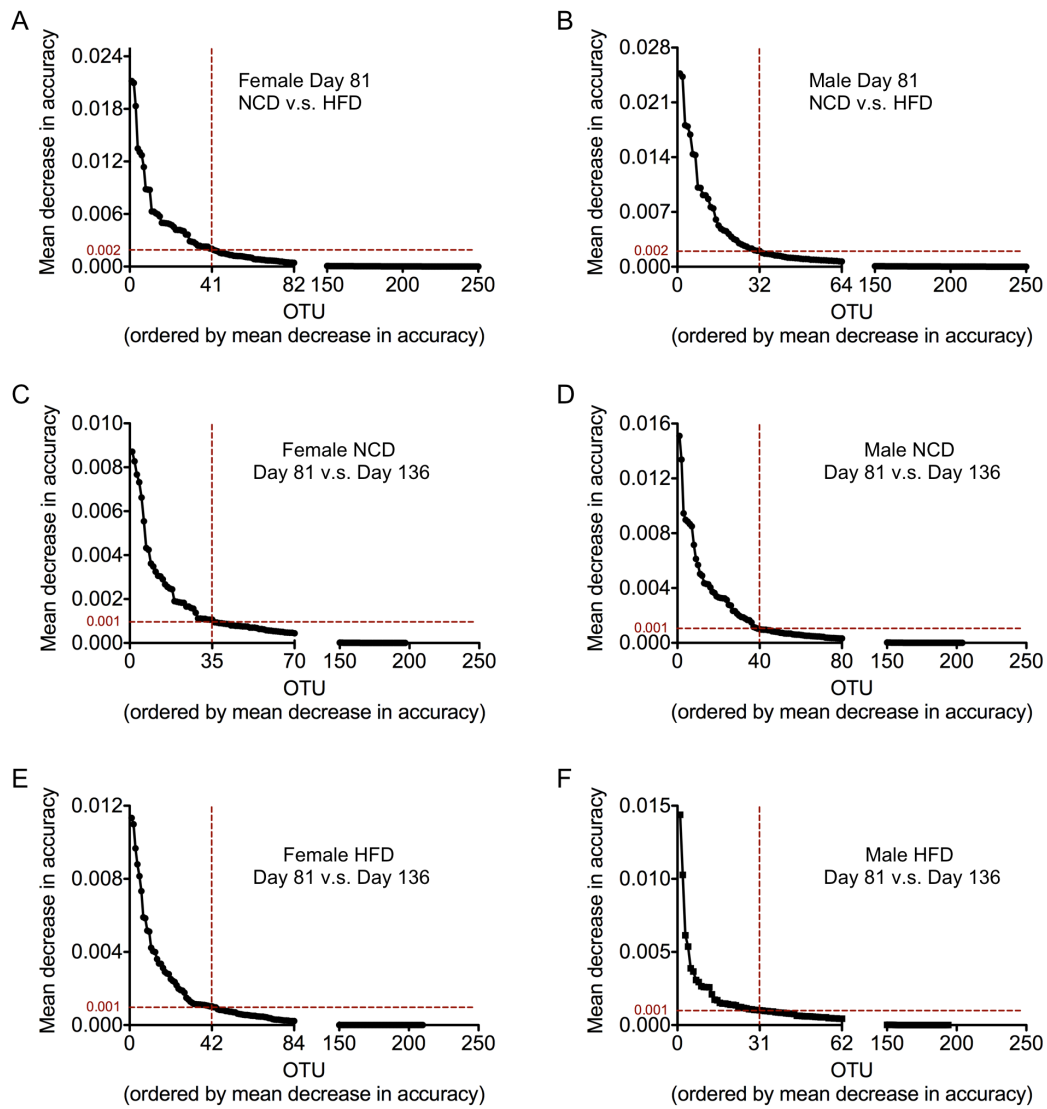

**Supplementary Figure 4** | key OTUs were identified by applying Random Forest classification for (A) different diet of female, (B) different diet of male, (C) stress of female on NCD, (D) stress of male on NCD, (E) stress of female on HFD and (F) stress of male on HFD, ranked in descending order of their feature accuracy of the models.

## Supplementary Figure 5

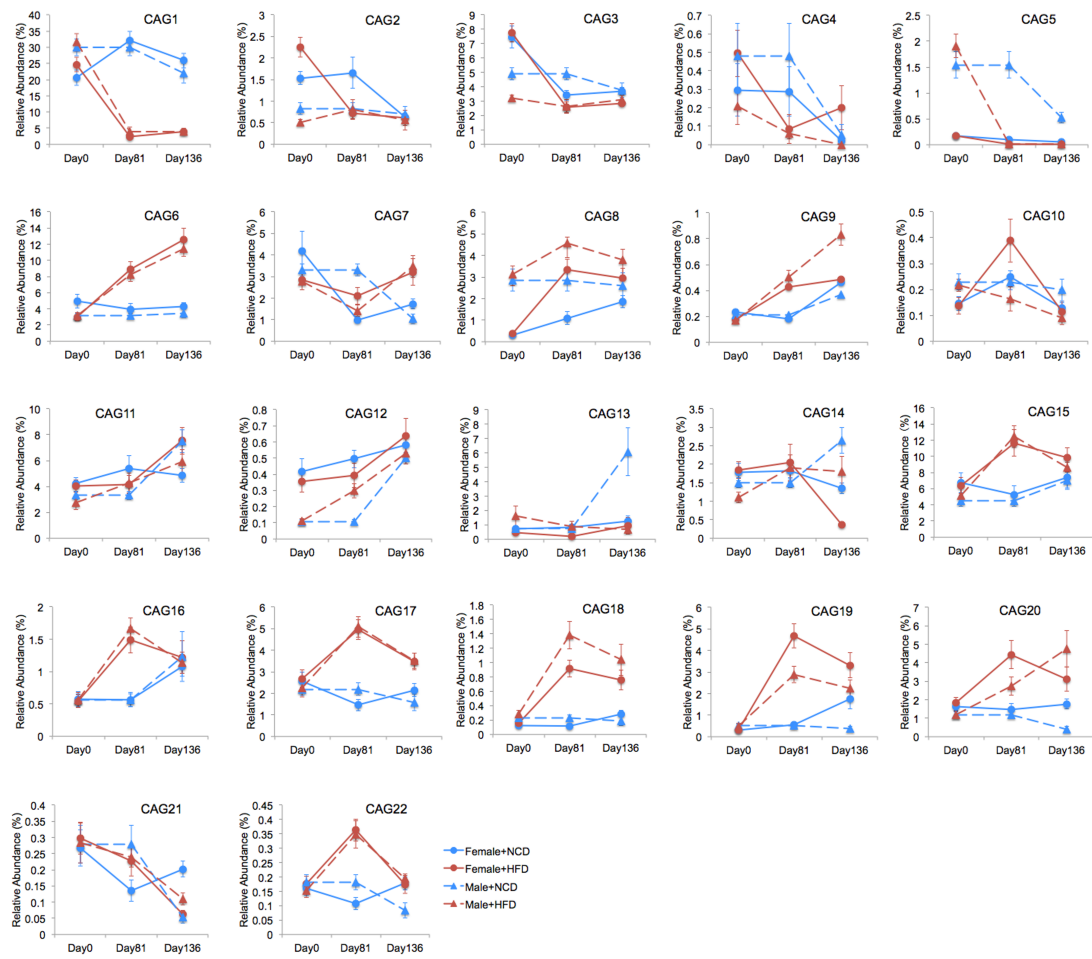

**Supplementary Figure 5 | Group level abundance shifts of CAGs during intervention.**
